# Supplementary material
Source: ML conference proceedings conference paper supplement (https://www.ecva.net/papers/eccv_2020/papers_ECCV/html/123460018_ECCV_2020_paper.php)
Supplement: Supplementary file 2 [file 123460018-supp.zip]

Archive with 5 entries (5 files):
- DeepFit_supplemental_material.pdf
- Boxy_smooth100k_noise_removal.webm
- cup100k_noise_removal.webm
- Netsuka100k_noise_removal.webm
- star_smooth100k_noise_removal.webm
